# Supplementary material
Source: publisher figshare collection journal article supplement (https://sage.figshare.com/ndownloader/files/20780304)
Supplement: Supplementary file 1 [file 20780304]

## **M2 Phenotype Macrophages Colocalize with Schwann Cells in Human Dental Pulp**

N. Yoshiba, N. Edanami, N. Ohkura, T. Maekawa, N. Takahashi, A. Tohma, K. Izumi, T. Maeda, A. Hosoya, H. Nakamura, K. Tabeta, Y. Noiri, and K. Yoshiba

## **Appendix**

### **Materials and Methods**

#### **Schwann cell isolation**

Magnetic activated cell separation (MACS) was performed for Schwann cell selection (Miltenyi Biotec, Bergisch Gladbach, Germany), according to the manufacturer's instructions. Briefly, cells were resuspended in separation buffer (PBS containing 0.5% bovine serum albumin and 2 mM EDTA), incubated for 20 min at 4°C with MicroBeads conjugated to a monoclonal anti-p75 nerve growth factor receptor (NGFR) antibody (Miltenyi Biotec) and blocking reagent, washed with separation buffer, and then centrifuged at  $300 \times g$  for 5 min at 4°C. Cells were resuspended in separation buffer and applied to a MACS Column (MS type; Miltenyi Biotec) placed in the MiniMACS Separator (Miltenyi Biotec). The column was washed three times, and the retained magnetically labeled cells were flushed out with separation buffer as the NGFR-positive fraction.

#### **Flow cytometric analysis**

We performed flow cytometric analysis of healthy human samples isolated from three individuals. The healthy pulp tissue was removed, minced into small pieces (1 mm), and then incubated in Dulbecco's modified Eagle's medium containing 2 mg/ml collagenase and 5 mg/ml dispase at 37°C in a humidified atmosphere with 5% CO<sub>2</sub> for 80 min. The pulp tissue was completely dissociated, and

the cell suspension was wash twice with PBS and then passed through a 70- $\mu$ m nylon mesh filter. We obtained  $1\text{--}1.5 \times 10^6$  cells per individual. Isolated single cells were fixed with 4% paraformaldehyde in cold PBS, followed by washing twice with FACS buffer (2% FBS/PBS), and then blocking Fc receptors using an anti-CD16/32 antibody (Invitrogen, CA, USA). After washing, the sample was incubated with fluorescently labelled antibodies against CD68, CD86, and CD163 as listed in Appendix Table 2. Isotype control antibodies were purchased from eBioscience (CA, USA). The labeled cells were washed twice to remove unbound antibodies and analyzed by flow cytometry (NovoCyt Flow Cytometer; ACEA Biosciences, Inc., CA, USA).

### **Immunofluorescence and immunohistochemistry**

Immunostaining was performed as previously described (Yoshida et al. 2018) using the primary antibodies listed in Appendix Table 2. The secondary antibodies were horseradish peroxidase (HRP)-labeled swine anti-rabbit IgG (Dako), HRP-labeled rabbit anti-mouse IgG (Dako), Alexa Fluor 488 goat anti-rabbit IgG, and Alexa Fluor 546 goat anti-mouse IgG (Invitrogen).

### **Quantitative RT-PCR**

Total RNA was isolated from cocultures or THP-1 macrophages cultured alone for 7 days using an RNeasy Plus Micro kit (Qiagen, Hilden, Germany), according to the manufacturer's instructions. Quantitative RT-PCR was carried out using a One Step SYBR PrimeScript PLUS RT-PCR kit (Takara Bio, Shiga, Japan) with the Opticon Real-Time PCR System (MJ Research, MA). The primer sets are listed in Appendix Table 3. Data were presented as the mean  $\pm$  SEM ( $n = 3$ ). Statistical significance between two groups was evaluated by the Student's *t*-test and considered significant at  $P < 0.05$ .

**Appendix Table 1.** Carious teeth examined in the present study

| No. (images) | Lesion activity    | Depth of cavity | Clinical symptoms                                                         |
|--------------|--------------------|-----------------|---------------------------------------------------------------------------|
| 1            | slowly progressing | I               | -                                                                         |
| 2            | slowly progressing | I               | -                                                                         |
| 3            | slowly progressing | II              | -                                                                         |
| 4            | slowly progressing | II              | -                                                                         |
| 5            | slowly progressing | III             | -                                                                         |
| 6 (Fig. 3C)  | slowly progressing | III             | -                                                                         |
| 7 (Fig. 3A)  | active             | I               | -                                                                         |
| 8            | active             | I               | -                                                                         |
| 9            | active             | I               | -                                                                         |
| 10           | active             | II              | -                                                                         |
| 11           | active             | II              | lingering sensitivity to air blowing /<br>no episodes of spontaneous pain |
| 12           | active             | III             | faint sensitivity to air blowing /<br>no episodes of spontaneous pain     |
| 13 (Fig. 3B) | active             | III             | faint sensitivity to air blowing /<br>no episodes of spontaneous pain     |
| 14 (Fig. 3D) | active             | III             | high sensitivity to air blowing /<br>episodes of spontaneous pain         |

Lesion activity: active, yellowish discolored dentin; slowly progressing, brownish discolored dentin

Depth of cavity: grade I, less than one-third of the dentin; grade II, from one-to two-thirds; grade III, more than two-thirds

**Appendix Table 2.** Antibodies used in the present study

| Antibody     | Isotype     | Clone      | Manufacturer     | Fluorochrome |
|--------------|-------------|------------|------------------|--------------|
| CD68         | Mouse IgG1  | KP1        | Dako             |              |
| CD86         | Rabbit IgG  | Polyclonal | Bioss            |              |
| CD163        | Mouse IgG1  | 10D6       | Leica Biosystems |              |
| CD163        | Mouse IgG1  | EDHu-1     | Serotec          |              |
| CD138        | Mouse IgG1  | MI15       | Dako             |              |
| HLA-class II | Mouse IgG1  | CR3/43     | Dako             |              |
| NGFR         | Rabbit IgG  | EP1039Y    | abcam            |              |
| NGFR         | Mouse IgG1  | REA648     | Miltenyi Biotec  | PE           |
| S100         | Rabbit IgG  | Polyclonal | Dako             |              |
| S100         | Mouse IgG2a | 4B3        | abcam            |              |
| MBP          | Rabbit IgG  | Polyclonal | proteintech      |              |
| BDNF         | Rabbit IgG  | EPR1292    | abcam            |              |
| CD68         | Mouse IgG2a | Y1/82A     | BioLegend        | FITC (FACS)  |
| CD86         | Mouse IgG1  | BU63       | BioLegend        | APC (FACS)   |
| CD163        | Mouse IgG1  | GHI/61     | BioLegend        | PE (FACS)    |

**Appendix Table 3.** Primer sequences for quantitative RT-PCR analysis

| <i>Gene</i>    | <i>Primer</i>                                                                  |
|----------------|--------------------------------------------------------------------------------|
| CD68           | sense: 5'-GCTACATGGCGGTGGAGTACAA-3'<br>antisense: 5'-ATGATGAGAGGCAGCAAGATGG-3' |
| CD163          | sense: 5'-CCAGTCCCAAACACTGTCCT-3'<br>antisense: 5'-ATGCCAGTGAGCTTCCCGTTCAGC-3' |
| $\beta$ -actin | sense: 5'-GATTCCTATGTGGGCGACGA-3'<br>antisense: 5'-GTGGTGCCAGATTTTCTCCA-3'     |

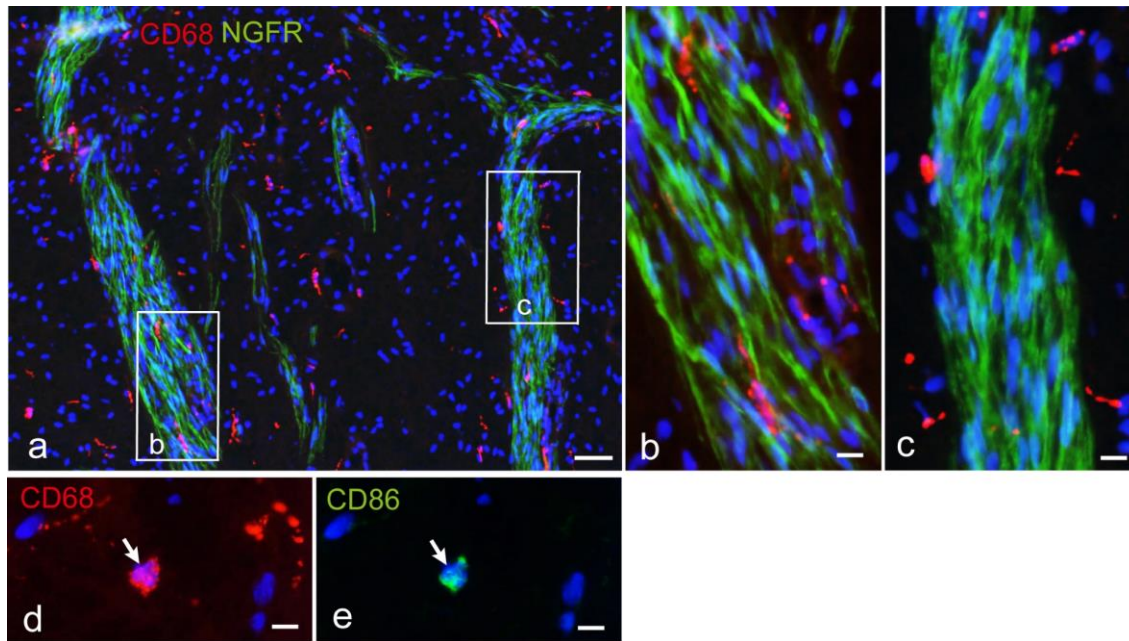

**Appendix Figure.** Double immunofluorescence staining of CD68 (pan-macrophage marker) and nerve growth factor receptor (NGFR) (a–c) or CD86 (M1 phenotype marker) (d, e) in healthy dental pulp. (b) and (c) are closer views of the boxed area in (a). White arrows in (d, e) indicate M1 phenotype macrophage. Nuclei were counterstained with DAPI (blue). Scale bars: 50  $\mu\text{m}$  (a), 10  $\mu\text{m}$  (b–e).
